# Supplementary material for: Alteration of Endothelin 1, MCP-1 and Chromogranin A in patients with atrial fibrillation undergoing pulmonary vein isolation
Source: PLoS One. 2017 Sep 8;12(9):e0184337. doi: 10.1371/journal.pone.0184337 (PMC5590904; doi:10.1371/journal.pone.0184337)
Supplement: S1 Table — GFR, glomerular filtration rate; LA, left atrium. (XLSX) [file pone.0184337.s001.xlsx]

## Sheet: Supplemental
Alteration of Endothelin 1, MCP-1 and Chromogranin A in patients with atrial fibrillation undergoing pulmonary vein isolation
Supplemental
S1. Tables 1. Patient characteristics														S2. Figure 1. Plasma levels of Endothelin-1 [pg/ml].				S3. Figure 2. Plasma levels of MCP-1 [pg/ml]				S4. Figure 3. Plasma levels of CGA [ng/ml]
ID	Sex	Age (years)	AF recurrence	AF type	previous ablation	creatinine levels (mg/dl)	GFR (ml/min.)	coronary artery disease	diabetes mellitus	hypercholesterolemia	ejection fraction (%)	LA diameter (mm)		control group	study group			control group	study group			control group	study group
															before ablation	after ablation			before ablation	after ablation			before ablation	after ablation
1	male	67	no	paroxysmal	no	1.2	>60	no	no	no	65	34		2.05	3.54	3.53		154	478	624		33.14	29.9	42.1
2	female	67	no	persistant	no	1.5	36	no	yes	no	65	41		2.65	3.32	2.58		157	808	789		80.62	12.5	20.8
3	female	76	no	paroxysmal	no	0.9	>60	no	no	yes	65	42		1.29	2.2	2.25		161	445	311		13.51	107	49.8
4	female	77	no	paroxysmal	yes	0.9	>60	no	no	yes	65	30		1.57	2.94	3.03		163	177	270		41.82	24.6	29.3
5	male	49	no	paroxysmal	no	1.3	>60	no	no	no	62	20		1.2	2.41	2.08		165	239	335		88.83	37.1	57.2
6	female	74	no	paroxysmal	no	1	>60	no	no	yes	65	40		1.56	1.89	2.18		171	686	1050		23.78	12.4	26.9
7	male	53	no	paroxysmal	no	1	>60	no	no	no	65	43		1.6	1.65	1.72		171	350	352		32.51	44.8	25.9
8	female	70	no	paroxysmal	no	0.8	>60	no	no	no	65	44		1.54	2.01	2.21		176	494	416		9.65	8.03	12
9	female	63	no	paroxysmal	no	0.7	>60	no	no	no	65	39		1.73	2.12	2.02		178	269	368		468.17	38.5	20.5
10	male	60	yes	paroxysmal	no	1	>60	yes	no	yes	65	34		1.44	2.42	2.17		182	210	564		49.08	5.24	1.82
11	male	61	no	paroxysmal	no	1	>60	no	no	no	65	35		1.65	2.08	1.99		187	353	374		5.7	29.6	22.2
12	male	61	no	paroxysmal	no	1.1	>60	yes	no	no	65	38		1.44	2.09	1.93		189	339	447		27.39	12.3	6.78
13	female	51	no	paroxysmal	no	0.8	>60	no	no	no	65	38		1.31	1.89	2.07		191	475	424		28.19	26.7	29.5
14	female	65	no	paroxysmal	no	1	>60	no	no	no	42	35		2.09	1.88	2.25		193	327	425		432	40.2	35.3
15	male	75	no	paroxysmal	no	1	>60	yes	no	yes	65	n.a.		1.46	2.5	2.18		193	613	625		201.45	68.9	60.5
16	male	41	yes	paroxysmal	no	0.9	>60	no	no	yes	65	36		1.96	2.22	2.36		196	710	1820		35.84	35.2	75.2
17	male	53	no	persistant	yes	1.2	>60	no	no	yes	65	46		1.8	2	1.86		222	391	335		36.13	31.3	15.6
18	male	73	no	paroxysmal	no	1.5	48	yes	no	no	n.a.	n.a.		3.75	2.72	2.33		223	415	444		35.42	105	47.9
19	male	62	no	paroxysmal	no	1.1	>60	yes	no	yes	65	36		1.54	1.65	1.94		227	407	377		70.36	34.3	32.2
20	male	48	no	paroxysmal	no	1.1	>60	no	no	no	n.a.	n.a.		1.32	1.94	1.66		227	469	480		29.13	9.71	7.44
21	female	70	no	persistant	no	1	59	no	no	no	n.a.	n.a.		1.94	2.65	2.15		227	255	350		17.57	10.8	7.72
22	male	54	yes	paroxysmal	no	1.1	>60	no	no	yes	63	33		1.56	2.6	2.49		230	359	232		133.76	15.5	12.4
23	female	62	no	paroxysmal	no	0.9	>60	no	yes	no	65	45		1.55	2.26	2.1		232	271	284		4.94	5.25	9.94
24	male	74	no	paroxysmal	no	1	>60	no	no	no	65	40		1.53	2.31	2.33		251	449	608		13.16	15.9	11.7
25	male	66	no	persistant	no	1.5	53	yes	no	no	63	38		1.42	2.77	2.38		254	207	232		15.2	11.3	9.02
26	female	69	no	persistant	no	1.1	54	no	no	no	62	45		1.6	2.83	2.59		257	254	204		64.68	29	19.1
27	female	58	no	paroxysmal	no	1	>60	no	no	no	65	30		2.49	2.88	2.58		260	147	215		19.91	29.2	13.4
28	male	61	no	persistant	yes	1.2	>60	no	no	yes	65	45		1.57	2.58	2.4		261	282	178		5.95	9.72	10.3
29	female	74	yes	paroxysmal	no	0.8	>60	no	no	no	65	46		2.03	2.64	2.68		271	211	212		11.41	55.7	36.7
30	male	53	no	paroxysmal	no	1.2	>60	no	no	yes	n.a.	n.a.		1.42	2.74	2.4		280	234	348		28.32	8.83	9.11
31	female	66	no	paroxysmal	no	0.8	>60	no	no	no	n.a.	41		1.54	2.71	2.6		280	154	147		13.98	8.86	34.8
32	male	61	no	paroxysmal	no	1.1	>60	no	no	no	65	44		1.69	2.27	2.11		280	338	310		11.06	12.2	7.14
33	male	72	no	persistant	yes	1.3	58	yes	no	yes	60	42		0.75	4.15	4.01		284	585	467		11.91	15.8	13.5
34	female	74	yes	paroxysmal	yes	1.1	53	no	no	no	65	44		0.95	3	2.94		293	355	200		22.12	8.92	9.53
35	female	70	no	paroxysmal	no	0.9	>60	yes	no	no	65	40		1.36	4.02	3.92		302	425	245		11.98	25.9	40.9
36	male	65	no	persistant	no	1.1	>60	no	no	no	n.a.	n.a.		3.03	2.25	2.19		306	215	337		8.07	25.9	71.7
37	male	69	no	paroxysmal	no	1.3	57	yes	no	yes	53	52		9.65	2.4	2.32		320	245	299		15.06	35.1	26.3
38	male	65	no	paroxysmal	no	1.4	56	no	no	no	n.a.	n.a.		35.23	1.78	1.74		325	337	470		11.82	25	26.6
39	male	68	no	paroxysmal	no	1	>60	no	no	no	59	39		125.88	2.23	2.33		333	385	289		45.89	22.6	24.6
40	female	53	no	paroxysmal	no	0.9	>60	no	no	yes	65	44		464.78	1.77	1.72		370	189	356		12.9	12.7	18.5
41	male	63	yes	persistant	no	1.3		yes	no	no	65	48			2.91	2.71			167	242			9.88	31.1
42	male	50	no	paroxysmal	no	0.8	>60	no	yes	no	55	51			2.84	2.51			275	407			8.79	39.3
43	female	69	yes	persistant	no	0.8	>60	yes	no	no	41	37			3.39	3.81			105	196			8.82	22.1
44	male	55	yes	paroxysmal	no	1	>60	no	no	no	n.a.	45			3.52	3.21			200	299			37.8	12.6
45	female	65	no	persistant	no	0.8	>60	no	no	no	40	42			3.16	3.02			140	392			10.6	13
46	male	64	no	paroxysmal	no	0.9	>60	no	no	no	n.a.	n.a.			2.39	2.5			149	191			8.86	8.92
47	male	68	no	paroxysmal	yes	0.9	>60	yes	no	yes	65	35			2.98	2.51			373	338			8.84	10.5
48	male	60	yes	paroxysmal	no	1.4	56	yes	no	no	n.a.	n.a.			4.34	4.33			383	489			76.6	126
49	male	62	no	paroxysmal	no	1.2	>60	no	no	no	n.a.	64			3.68	2.56			266	305			9.54	48.3
50	male	63	no	paroxysmal	no	1.2	>60	no	no	no	n.a.	n.a.			2.13	2.16			345	403			14.8	16.9
51	female	80	no	persistant	no	0.7	>60	yes	no	no	65	33			2.42	2.84			322	250			13.4	16.7
52	male	67	no	paroxysmal	no	1.1	>60	no	no	no	65	48			2.13	2.14			300	378			7.33	10.8
53	male	69	no	persistant	no	1.7	42	no	no	no	40	40			2.77	2.19			210	435			237	752
54	female	69	no	persistant	no	1.3	43	no	no	no	n.a.	n.a.			2.73	2.77			126	305			9.23	8.84
55	male	71	no	paroxysmal	no	1.1	>60	no	no	no	65	40			2.59	2.38			434	805			1.96	2.92
56	male	41	no	persistant	no	1.3	>60	no	no	no	60	43			2.19	2.18			171	236			14.8	28.7
57	male	69	no	paroxysmal	no	1.2	>60	no	no	no	65	39			2.96	2.52			182	298			6.08	21
58	male	46	no	paroxysmal	no	1.2	>60	no	no	no	n.a.	n.a.			2.37	2.35			91.9	188			11.6	20.9
59	male	50	no	persistant	yes	1	>60	no	no	no	65	n.a.			2.04	2.02			115	427			14.1	23.6
60	male	28	no	paroxysmal	no	1.3	>60	no	no	no	65	41			2	1.99			126	365			2.21	8.08
61	female	70	no	paroxysmal	no	1	60	no	yes	no	65	38			2.64	2.04			197	242			1.91	3.7
62	male	63	yes	persistant	no	1.2	>60	no	no	no	65	45			2.38	2.33			345	552			5.87	11.3
63	female	61	no	persistant	no	0.8	>60	no	no	no	65	48			3.12	3.42			350	808			9.8	8.8
64	male	76	no	paroxysmal	no	1.1	>60	no	no	no	65	46			4.11	3.76			265	474			2.92	25.4
65	male	45	no	paroxysmal	no	0.8	>60	no	no	no	65	43			3.59	3.56			160	467			0.08	0.71
66	male	61	no	paroxysmal	no	1	>60	no	no	no	65	n.a.			3.9	3.71			203	319			27	28.4
67	male	40	no	paroxysmal	no	1	>60	no	no	no	59	36			4.37	3.55			1650	388			15.7	6.75
68	female	59	no	persistant	no	1.2	51	yes	no	no	n.a.	n.a.			4.1	4.1			288	711			108	187
69	female	52	no	paroxysmal	no	0.7	>60	no	no	no	n.a.	45			2.83	2.25			156	326			5.64	13.7
70	female	45	no	paroxysmal	no	1.1	>60	no	no	no	65	35			2.85	2.23			413	463			2.97	3.04
71	female	65	no	paroxysmal	no	0.9	>60	no	no	no	65	50			3	2.65			339	206			0	4.29
72	female	45	no	paroxysmal	no	0.9	>60	no	no	no	n.a.	50			2.57	2.27			133	244			0.34	8.32
73	male	69	no	persistant	no	1.2	>60	no	no	no	60	55			2.71	2.23			267	328			81.7	202
74	male	58	no	persistant	no	1	>60	no	no	no	54	50			2.13	1.91			142	264			1.26	2.09
75	male	70	no	paroxysmal	no	0.9	>60	no	no	no	n.a.	n.a.			3.83	3.75			185	194			13.9	115
76	female	69	yes	paroxysmal	no	1	58	no	no	no	n.a.	n.a.			2.21	2.14			193	297			187	30.3
77	female	61	yes	paroxysmal	no	0.9	>60	no	yes	no	65	44			3.96	3.68			429	515			14.6	19.5
78	female	75	yes	persistant	no	1	58	no	no	no	29	43.3			3.71	4.01			340	370			5.75	2.66
79	male	44	no	paroxysmal	no	1.1	>60	no	no	no	65	39			3.78	3.41			303	361			28.3	22.2
80	male	44	yes	paroxysmal	yes	1	>60	no	no	no	62	44			3.53	3.37			232	226			5.58	10.3
81	female	73	yes	paroxysmal	no	1	59	no	no	no	n.a.	49			4.26	3.85			330	390			13.7	17
82	female	45	no	paroxysmal	yes	0.7	>60	no	no	no	65	42			3.41	3.23			239	251			14.2	19.1
83	female	71	no	paroxysmal	no	1.2	48	yes	no	no	n.a.	51			3.86	3.59			517	538			65.3	91.8
84	male	55	yes	paroxysmal	no	1	>60	no	no	no	65	48			4.05	4.09			473	375			7.28	10.9
85	male	67	no	paroxysmal	no			no	no	no	65	36			3.62	3.81			169	344			18	15.2
86	female	67	no	paroxysmal	no	1.4	40	no	no	no	n.a.	42			2.03	1.89			153	416			95.5	250
87	female	35	no	paroxysmal	no	0.8	>60	no	no	no	65	36			3.47	3.54			160	273			29.9	121
88	female	71	no	paroxysmal	no	1.1	55	no	no	no	65	49			2.31	1.92			381	436			66.6	184
89	male	78	no	persistant	no	1.2	>60	no	no	no	55	42			2.13	1.84			192	529			29.2	21.6
90	male	40	no	persistant	no	1	>60	no	no	no	53	47			2.29	1.93			182	338			17.1	26.3
91	male	71	yes	paroxysmal	no	1.2	>60	no	no	no	n.a.	n.a.			2.21	1.99			162	340			7.58	6.35
92	female	49	no	paroxysmal	no	0.8	>60	no	no	no	64	44			2.28	2.08			251	250			24.4	28.3
93	male	74	yes	persistant	no	1.6	47	yes	no	no	39	46			2.75	2.58			197	394			5.27	43.3
94	male	66	no	persistant	yes	1.7	43	yes	yes	no	65	n.a.			2.33	2.8			178	294			5.38	8.96
95	male	64	no	persistant	no	1.3	58	no	no	no	65	47			2.44	2.37			407	298			6.22	11
96	male	74	no	paroxysmal	no	1.4	52	yes	no	no	65	35			2.57	2.58			158	395			9.46	8.96
